# Supplementary material for: Performance of the Fecal Immunochemical Test in Detecting Advanced Colorectal Neoplasms and Colorectal Cancers in People Aged 40–49 Years: A Systematic Review and Meta-Analysis
Source: MDPI journal article supplement (doi:10.3390/cancers15113006), 2023-05-31
Supplement: s1 [file s1]

**File S1.** The search strategy by *advanced search* on PubMed and other databases

| Steps | Terms and strategy          |
|-------|-----------------------------|
| #1    | fecal immunochemical test   |
| #2    | fecal occult blood test     |
| #3    | stool occult blood test     |
| #4    | stool guaiac test           |
| #5    | #1 OR #2 OR #3 OR #4        |
| #6    | colorectal cancer           |
| #7    | colorectal adenocarcinoma   |
| #8    | colorectal polyp            |
| #9    | colorectal adenoma          |
| #10   | colorectal neoplasm         |
| #11   | #6 OR #7 OR #8 OR #9 OR #10 |
| #12   | #5 AND #11                  |
| #13   | "age"                       |
| #14   | #12 AND #13                 |
